# Supplementary material
Source: Springer Nature journal article supplement (https://www.springermedizin.de/resource/supplementary/12933_2013_632_MOESM2_ESM.pdf/9539020)

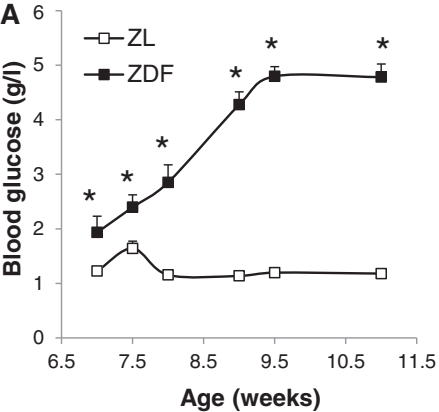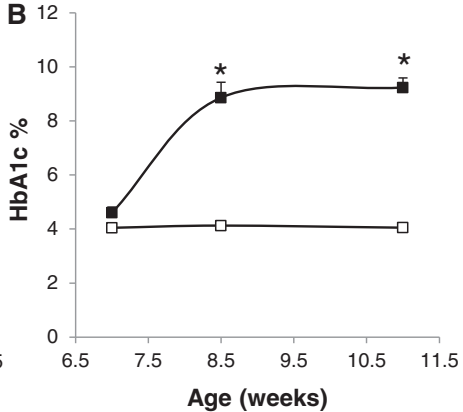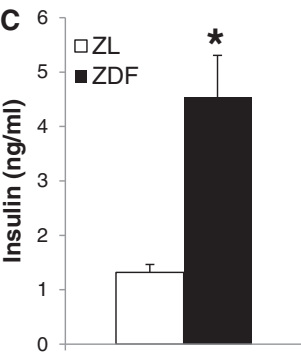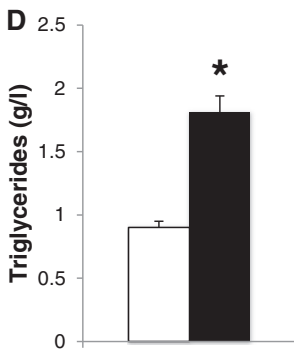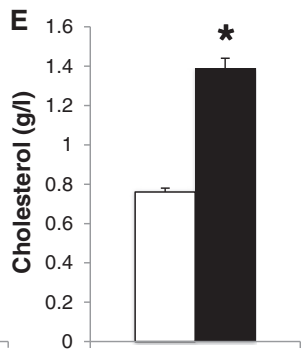

Supplement: MOESM2 [file 9539020]
